# Supplementary material for: Expression and Activity of the Transcription Factor CCAAT/Enhancer-Binding Protein β (C/EBPβ) Is Regulated by Specific Pulse-Modulated Radio Frequencies in Oligodendroglial Cells
Source: MDPI journal article supplement (doi:10.3390/ijms241311131), 2023-07-05
Supplement: s1 [file s1]

## *Supplementary Material*

# **Expression and Activity of the Transcription Factor CCAAT/Enhancer-Binding Protein $\beta$ (C/EBP $\beta$ ) Is Regulated by Specific Pulse-Modulated Radio Frequencies in Oligodendroglial Cells**

Bing Huang \*, Weihao Zhao, Xue Cai, Yumin Zhu, Yingxian Lu, Junli Zhao, Nan Xiang, Xiaofei Wang, Hu Deng, Xiaping Tang, Lingyu Liu, Yanyu Zhao and Yigong Shi \*

**\* Correspondence:**

Bing Huang, bhuangfd@stu.edu.cn; Yigong Shi, syg@westlake.edu.cn

## **Supplementary Materials and Methods**

### **1. The waveguide exposure apparatus**

To keep the power density absorbed by cultured cells as consistent as possible throughout the EMR radiation processes, we designed to place the 35-mm petri dishes in five chosen positions along the axial direction of the waveguide, where the EMR field strength was maximal according to the numerical calculations. Petri dishes were held by a custom-made bracket of PMMA that fits the size of the cavity inside the waveguide. The distance between the center of each two chosen positions was 7 cm. At each position, a stack of three petri dishes was placed along the vertical central line of the corresponding cross-section, with the petri dishes vertically aligned to each other and the gap between two adjacent dishes was 1.5 cm. The top layer, middle layer, and bottom layer petri dishes are named as layer A, layer B, and layer C, respectively. As shown in Figure 1A, cells on layer A of each waveguide were stimulated for 6 hours,

while those at layer B were stimulated for 48 hours. The rest layer C were filled by petri dishes with 2 mL medium. During experiments, after dissecting cells exposed for 6 hours on layer A, petri dishes with 2 mL media were placed back to layer A to maintain the uniform of the EMR field and the EMR stimulation was kept on for another 42 hours to accomplish 48 hours exposure. During the entire EMR stimulation process, all the fifteen positions were filled with petri dishes with 2 mL culture medium either with or without cells so that the EMR distribution in the system is stable throughout the experiment. Each cell dish taken out during the stimulating time span will be replaced by new dishes with 2 mL culture medium.

To make sure the influence of possible thermal effect of the EMR signals, we also recorded the temperature variation of the culture medium in each petri dish with overnight continuous stimulation or without stimulation. The temperature of the control groups (no EMR stimulation) and the RF groups (with continuous 30 dBm EMR stimulation for ~12 hours) are listed in Supplementary Table S6. The difference between the two groups after 12 hours of incubation was 0~0.3°C, which was acceptable because the difference is comparable to the scale of the error of measurement.

## **2. RNA sequencing libraries construction and data analysis**

Only samples with RIN > 7.0 were used to conduct library preparation and RNA sequencing process. A total amount of 2 µg RNA per sample was used as input material for the RNA sample preparations. Sequencing libraries were generated using NEBNext® UltraTM RNA Library Prep Kit for Illumina® (#E7530L, NEB, USA)

following the manufacturer's instructions. Concentration of library was measured using a Qubit<sup>®</sup> RNA Assay Kit in Qubit<sup>®</sup> 3.0 and then diluted to 1 ng/μl. The clustering of the index-coded samples was performed on a cBot cluster generation system using HiSeq PE Cluster Kit v4-cBot-HS (Illumina) according to the manufacturer's instructions. After cluster generation, the libraries were sequenced on an Illumina platform and 150 bp paired-end reads were generated. The processed sequencing data was downloaded from the company and obtained the QC metrics using FastQC with default parameters. rRNA reads were removed by mapping the processed data to rRNA sequence in Rat using bowtie with parameters "-v 1 -M 1 -m 10000 --best". Unmapped reads were used for further analysis. Then STAR was used to map the sequence to the Rat genome Rnor\_6.0 with default parameters. After mapping, we obtained the read count by featureCount using the following parameters: -T 2 -s 0 -p -t exon -g gene\_id. Then edgeR was used to identify differentially expressed genes.

## Supplementary Figures and Tables

### 1. Supplementary Figures

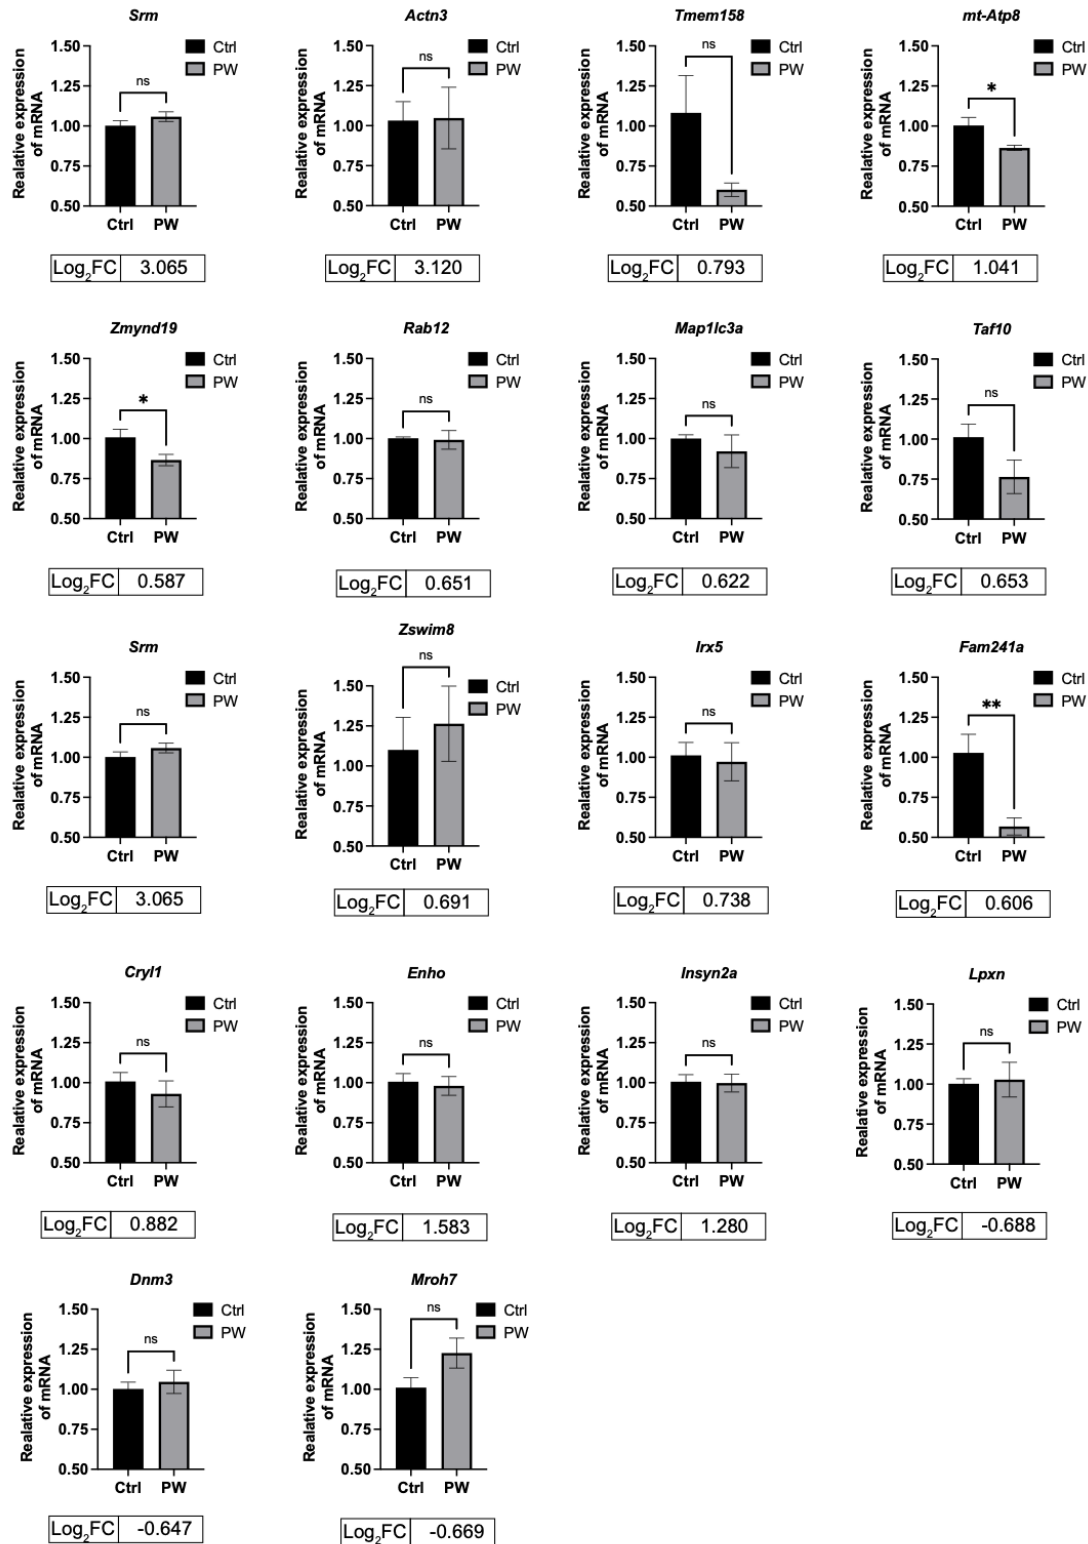

**Supplementary Figure S1. Transcription levels of other DEGs except for C/EBP $\beta$  shown in Figure 1B.** mRNA levels of those genes detected significantly changed by RNA sequencing were examined in independently generated samples after 6 hours of exposure to PW-RF. The RT-qPCR results failed to replicate the RNA sequencing data (Figure 1B). The table below each graph showed the log<sub>2</sub> fold change in RNA sequencing results.

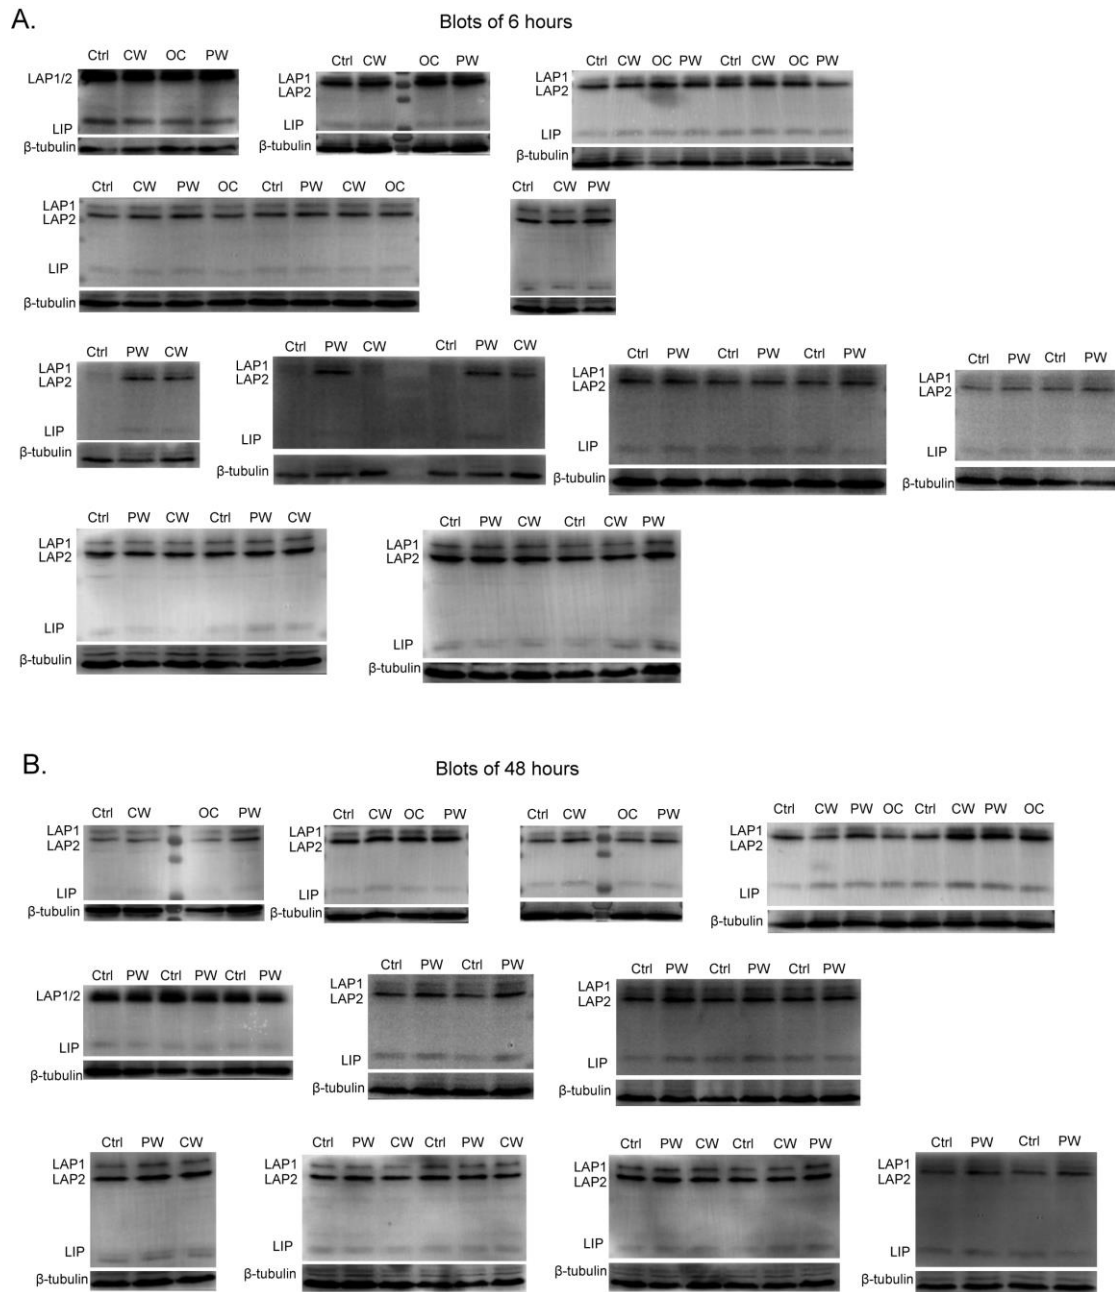

**Supplementary Figure S2. Western blots of C/EBP $\beta$  shown in Figure 2C-J. (A,B) All the blots of C/EBP $\beta$  isoforms in both 6-hour and 48-hour groups.**

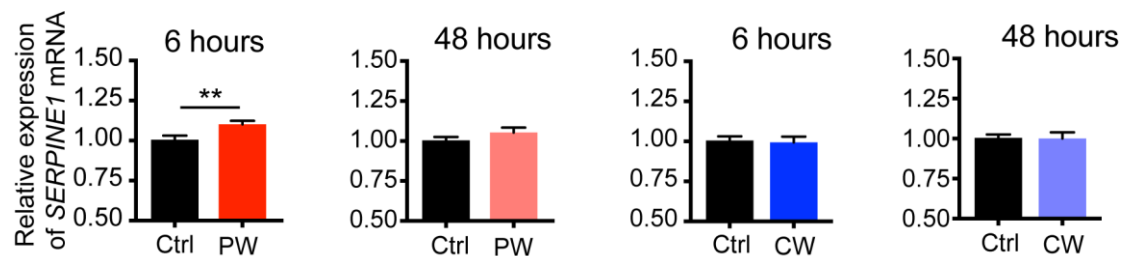

**Supplementary Figure S3. Transcription of *Serpine1* was mostly altered after 6 hours of exposure to PW-RF EMR. mRNA level of *Serpine1* was enhanced by 6 hours of PW-RF exposure but not by CW-RF or both 48 hours RF-EMR (n=10-14 per group). \*\* $p < 0.01$  vs. Ctrl.**

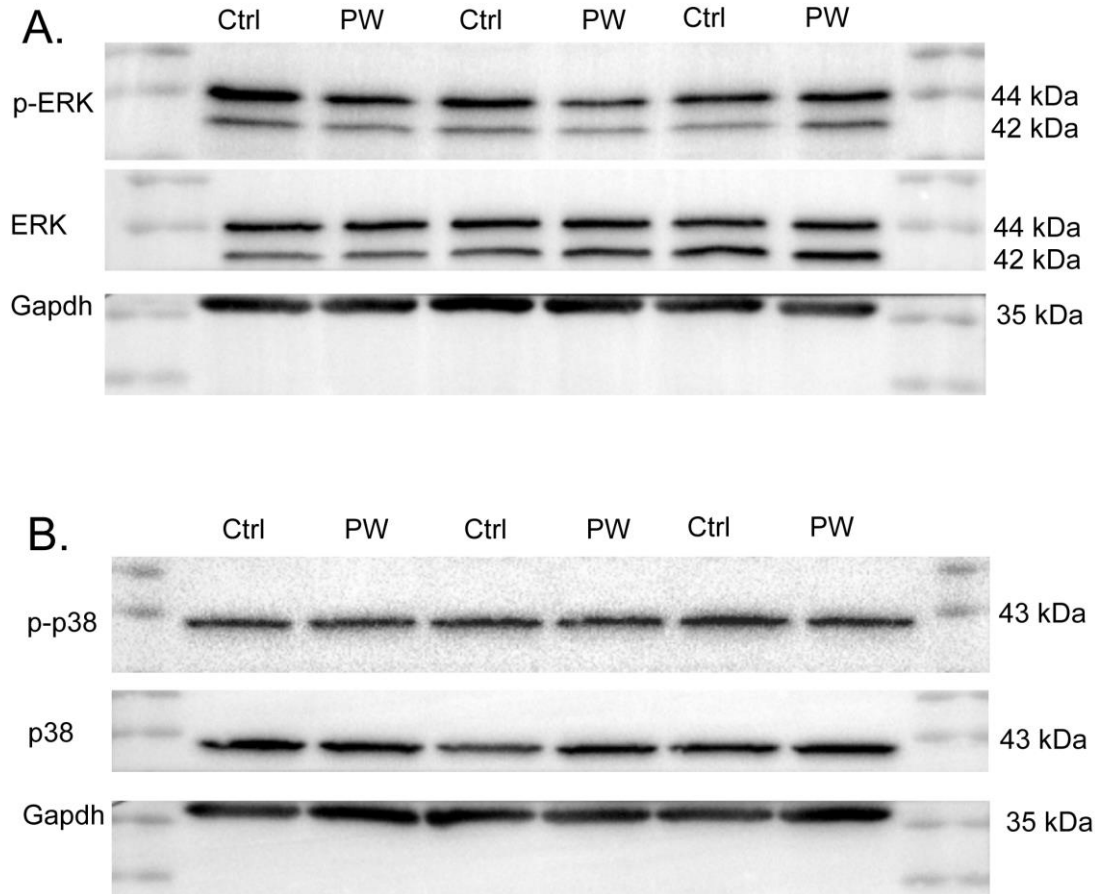

**Supplementary Figure S4. Western blots of ERK and p38 signaling shown in Figure 4D-E.** (A-B) Blottings of p-ERK/ERK and phos-p38/p38 in oligodendroglial cells after 6 hours of exposure to PW-RF.

## 2. Supplementary Tables

**Supplementary Table S1.** The designed primers for examining C/EBP $\beta$  and targeted genes transcription level.

| Gene Name                        | Forward Primer (5'-3') | Reverse Primer (5'-3') |
|----------------------------------|------------------------|------------------------|
| <i>R_C/EBP<math>\beta</math></i> | ATCGACTTCAGCCCCTA      | CTCACGTAACCGTAGTC      |
| <i>R_Actb</i>                    | GGTCATCACTATCGGCAAT    | GTGTTGGCATAGAGGTCTT    |
| <i>R_Mvp</i>                     | AGTTCAAGGAGATGACAGAG   | TCGGTGATGAGAGTGGAT     |
| <i>R_IL6</i>                     | AATCTGCTCTGGTCTTCTG    | ACTCCTTCTGTGACTCTAAC   |
| <i>R_Asns</i>                    | TCGGAAGAACACAGACAG     | GGCAGAGACAGGTAATAGG    |
| <i>R_Cavin1</i>                  | AACACCGTGAGCAAGTTG     | CCTCGTTGACCTCCAGTT     |
| <i>R_Ctgf</i>                    | GGTCTCTTCTGCGACTTC     | AACTGCTTTGGAAGGACTC    |
| <i>R_Shc1</i>                    | CGTGGAGGTCTTACAGTC     | GTGAGAGTGATCGGCATT     |
| <i>R_Klhdc4</i>                  | ATGGGCAAGAAGGGAAAG     | GGAACCGAACAGAAGAGG     |

|                 |                      |                    |
|-----------------|----------------------|--------------------|
| <i>R_Cxcl14</i> | GGTCCAAGTGTAAGTG TTC | ATCTTCTCCTCGCAGTGT |
| <i>R_Mmp15</i>  | AGCCTACACCTACTTCTACA | GAACCACCTCCTCCATCT |
| <i>R_Kdma5</i>  | TCCACCACTTCCTGATGT   | CTTACTAGCCGCCAGAAC |
| <i>R_Eif4g</i>  | GTCTCCTCACCACGATTG   | CAAGCACATCCTGTAGCA |
| <i>R_Vegfa</i>  | CTTGTTTCAGAGCGGAGAA  | CCTTGGCTTGTCACATCT |
| <i>R_Vegfb</i>  | CAACACCAAGTCCGAATG   | CTTCACAGCACTCTCCTT |
| <i>R_Alkhh5</i> | AGGATGAGTGCTCCAAGA   | GCTGGTAGTCGTTGATGA |
| <i>M_C/EBPβ</i> | AGCGACGAGTACAAGATG   | CTGCTCCACCTTCTTCTG |
| <i>M_Actb</i>   | GCACCACACCTTCTACAA   | TACGACCAGAGGCATACA |

**Supplementary Table S2.** Descriptions for abbreviations of C/EBPβ interacting proteins.

| Protein Name | Description                                                                                 |
|--------------|---------------------------------------------------------------------------------------------|
| RARS         | Arginine-tRNA ligase (UniProtKB: P40329)                                                    |
| P4HA1        | Prolyl 4-hydroxylase subunit alpha-1 (UniProtKB: P54001)                                    |
| NUDT21       | Cleavage and polyadenylation specificity factor subunit 5 (UniProtKB: Q4KM65)               |
| BAZ1A        | Bromodomain adjacent to zinc finger domain, 1A (UniProtKB: F1M4U9)                          |
| CLPX         | ATP-dependent Clp protease ATP-binding subunit clpX-like, mitochondrial (UniProtKB: Q5U2U0) |
| GIGYF2       | GRB10 interacting GYF protein 2 (UniProtKB: A0A096MJI4)                                     |
| ATF7         | Atf7 protein (UniProtKB: B0BMY0)                                                            |

**Supplementary Table S3.** The relative expression levels of C/EBPβ interacting proteins after 6 hours of exposure to CW-RF EMR.

| Gene Name | Relative Expression in Control Group | Relative Expression in CW-RF Group | <i>p</i> Value |
|-----------|--------------------------------------|------------------------------------|----------------|
| RARS      | 1.000 ± 0.089                        | 1.638 ± 0.176                      | 0.007          |
| P4HA1     | 1.000 ± 0.105                        | 1.666 ± 0.258                      | 0.037          |
| NUDT21    | 1.000 ± 0.073                        | 1.250 ± 0.057                      | 0.016          |
| BAZ1A     | 1.000 ± 0.193                        | 1.816 ± 0.150                      | 0.004          |
| CLPX      | 1.000 ± 0.105                        | 1.268 ± 0.122                      | 0.121          |
| GIGYF2    | 1.000 ± 0.225                        | 1.564 ± 0.078                      | 0.043          |
| ATF7      | 1.000 ± 0.027                        | 0.916 ± 0.062                      | 0.233          |

**Supplementary Table S4.** Descriptions for abbreviations of C/EBP $\beta$  target genes.

| Gene Name                     | Description                                                           |
|-------------------------------|-----------------------------------------------------------------------|
| <i>IL-6</i>                   | Interleukin 6 (Gene ID: 24498)                                        |
| <i>Mvp</i>                    | Major vault protein (Gene ID: 64681)                                  |
| <i>Asns</i>                   | Asparagine synthetase (Gene ID: 25612)                                |
| <i>Cavin1</i>                 | Caveolae associated protein 1 (Gene ID: 287710)                       |
| <i>Ctgf</i>                   | Cellular communication network factor 2 (Gene ID: 64032)              |
| <i>Shc1</i>                   | SHC adaptor protein 1 (Gene ID: 85385)                                |
| <i>Klhdc4</i>                 | Kelch domain containing 4 (Gene ID: 307917)                           |
| <i>Cxcl14</i>                 | C-X-C motif chemokine ligand 14 (Gene ID: 306748)                     |
| <i>Mmp15</i>                  | Matrix metalloproteinase 15 (Gene ID: 291848)                         |
| <i>Kdm5a</i>                  | Lysine demethylase 5A (Gene ID: 312678)                               |
| <i>Eif4g</i>                  | Eukaryotic translation initiation factor 4, gamma 2 (Gene ID: 361628) |
| <i>Vegfa</i>                  | Vascular endothelial growth factor A (Gene ID: 83785)                 |
| <i>Vegf<math>\beta</math></i> | Vascular endothelial growth factor B (Gene ID: 89811)                 |
| <i>Alkbh5</i>                 | alkB homolog 5, RNA demethylase (Gene ID: 303193)                     |

**Supplementary Table S5.** Transcription level of target genes of C/EBP $\beta$ . mRNA levels of target genes of C/EBP $\beta$ . mRNA expression of most of genes were not affected by any radiations (n=14-19 per group for 6 h groups; n=10-20 per group for 48 h groups). F.C represents Fold change.

| Gene                          | 6 hours |         |      |         | 48 hours |         |      |         |
|-------------------------------|---------|---------|------|---------|----------|---------|------|---------|
|                               | PW      |         | CW   |         | PW       |         | CW   |         |
|                               | F.C     | p value | F.C  | p value | F.C      | p value | F.C  | p value |
| <i>Cavin1</i>                 | 1.03    | 0.12    | 1.03 | 0.20    | 0.98     | 0.34    | 0.93 | 0.01    |
| <i>Ctgf</i>                   | 1.05    | 0.27    | 1.02 | 0.65    | 1.05     | 0.03    | 1.07 | 0.09    |
| <i>Shc1</i>                   | 1.04    | 0.07    | 1.04 | 0.19    | 1.04     | 0.06    | 1.03 | 0.16    |
| <i>Klhdc4</i>                 | 0.97    | 0.62    | 1.02 | 0.87    | 1.03     | 0.79    | 1.05 | 0.45    |
| <i>Cxcl14</i>                 | 0.99    | 0.78    | 1.03 | 0.44    | 1.05     | 0.22    | 0.98 | 0.47    |
| <i>Mmp15</i>                  | 1.02    | 0.64    | 1.04 | 0.21    | 1.00     | 0.92    | 1.02 | 0.39    |
| <i>Kdm5a</i>                  | 1.03    | 0.46    | 1.03 | 0.51    | 1.04     | 0.50    | 0.97 | 0.52    |
| <i>Eif4g</i>                  | 0.96    | 0.19    | 0.98 | 0.71    | 1.05     | 0.39    | 0.98 | 0.21    |
| <i>Vegfa</i>                  | 1.00    | 0.78    | 1.04 | 0.31    | 1.13     | 0.04    | 1.05 | 0.99    |
| <i>Vegf<math>\beta</math></i> | 0.89    | 0.35    | 1.02 | 0.31    | 1.05     | 0.18    | 1.00 | 0.53    |
| <i>Alkbh5</i>                 | 0.95    | 0.18    | 1.06 | 0.06    | 1.00     | 0.98    | 0.99 | 0.37    |



**Supplementary Table S6.** The temperature of cell culture medium after overnight exposure to RF-EMR. Petri dishes with 2 mL culture medium were placed in the waveguide and stimulated by continuous 30 dBm EMR stimulation (RF) or without stimulation (Control) overnight, after which temperature of medium were measured by a thermistor immediately. Number 1-5 represents designated locations of petri dishes from the side of short slide to the side of coaxial adaptor.

| <b>Temperature (°C)</b> | <b>1</b> | <b>2</b> | <b>3</b> | <b>4</b> | <b>5</b> |
|-------------------------|----------|----------|----------|----------|----------|
| <b>Control</b>          | 35.6     | 35.3     | 35.3     | 35.3     | 35.3     |
| <b>RF</b>               | 35.8     | 35.6     | 35.3     | 35.4     | 35.4     |
